# Supplementary material
Source: ML conference proceedings conference paper supplement (https://openaccess.thecvf.com/content/CVPR2024/html/Chan_R-Cyclic_Diffuser_Reductive_CVPR_2024_paper.html)

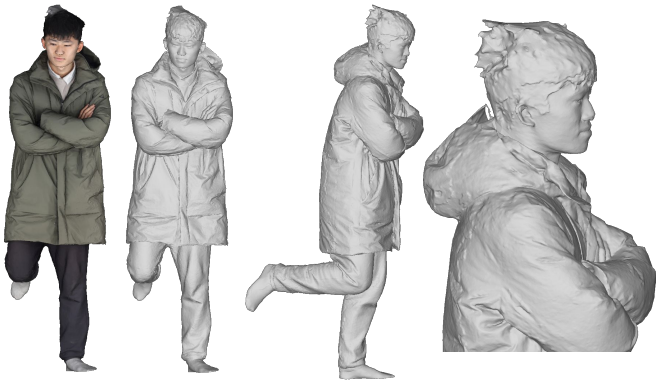

(a) Groundtruth

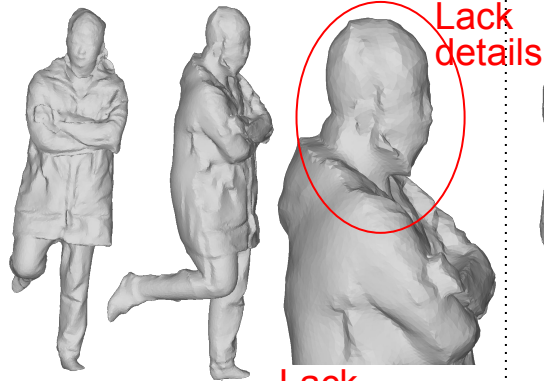

(b) ICON (uses SMPL-X)

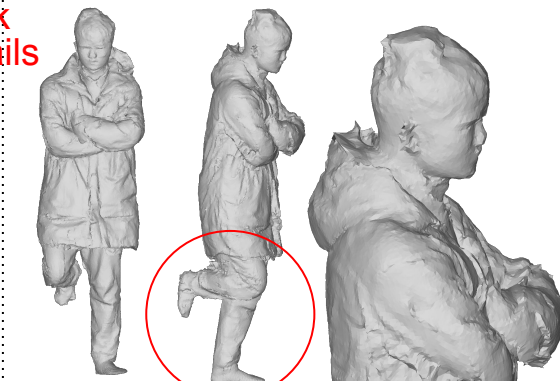

(c) Ours w/o SMPL-X

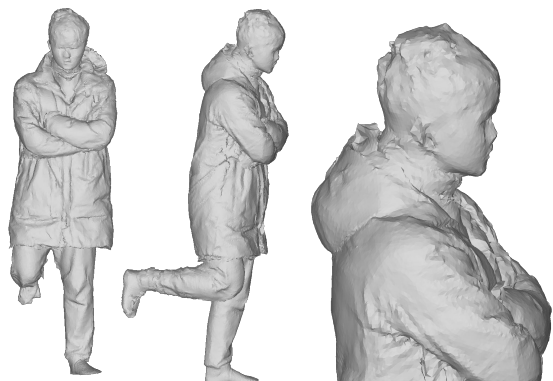

(d) Ours w SMPL-X

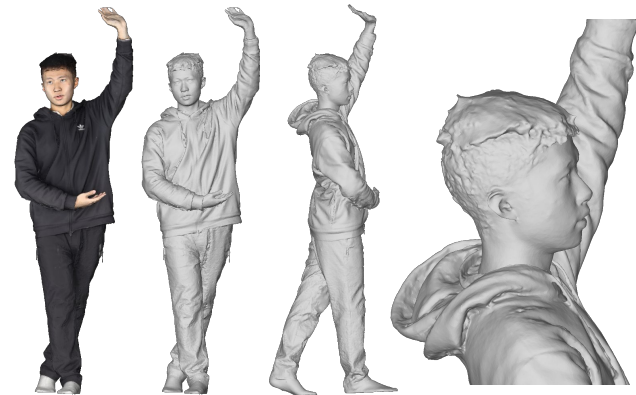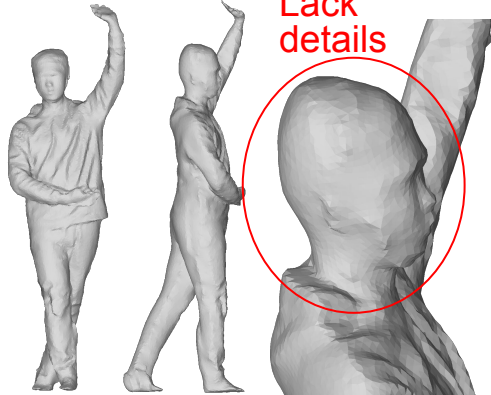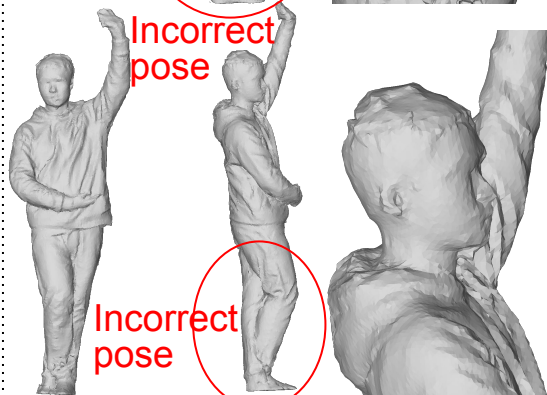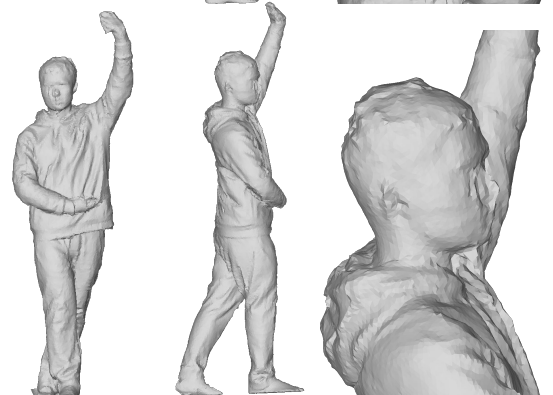

Supplement: Supplementary file 1 [file Chan_R-Cyclic_Diffuser_Reductive_CVPR_2024_supplemental.zip]

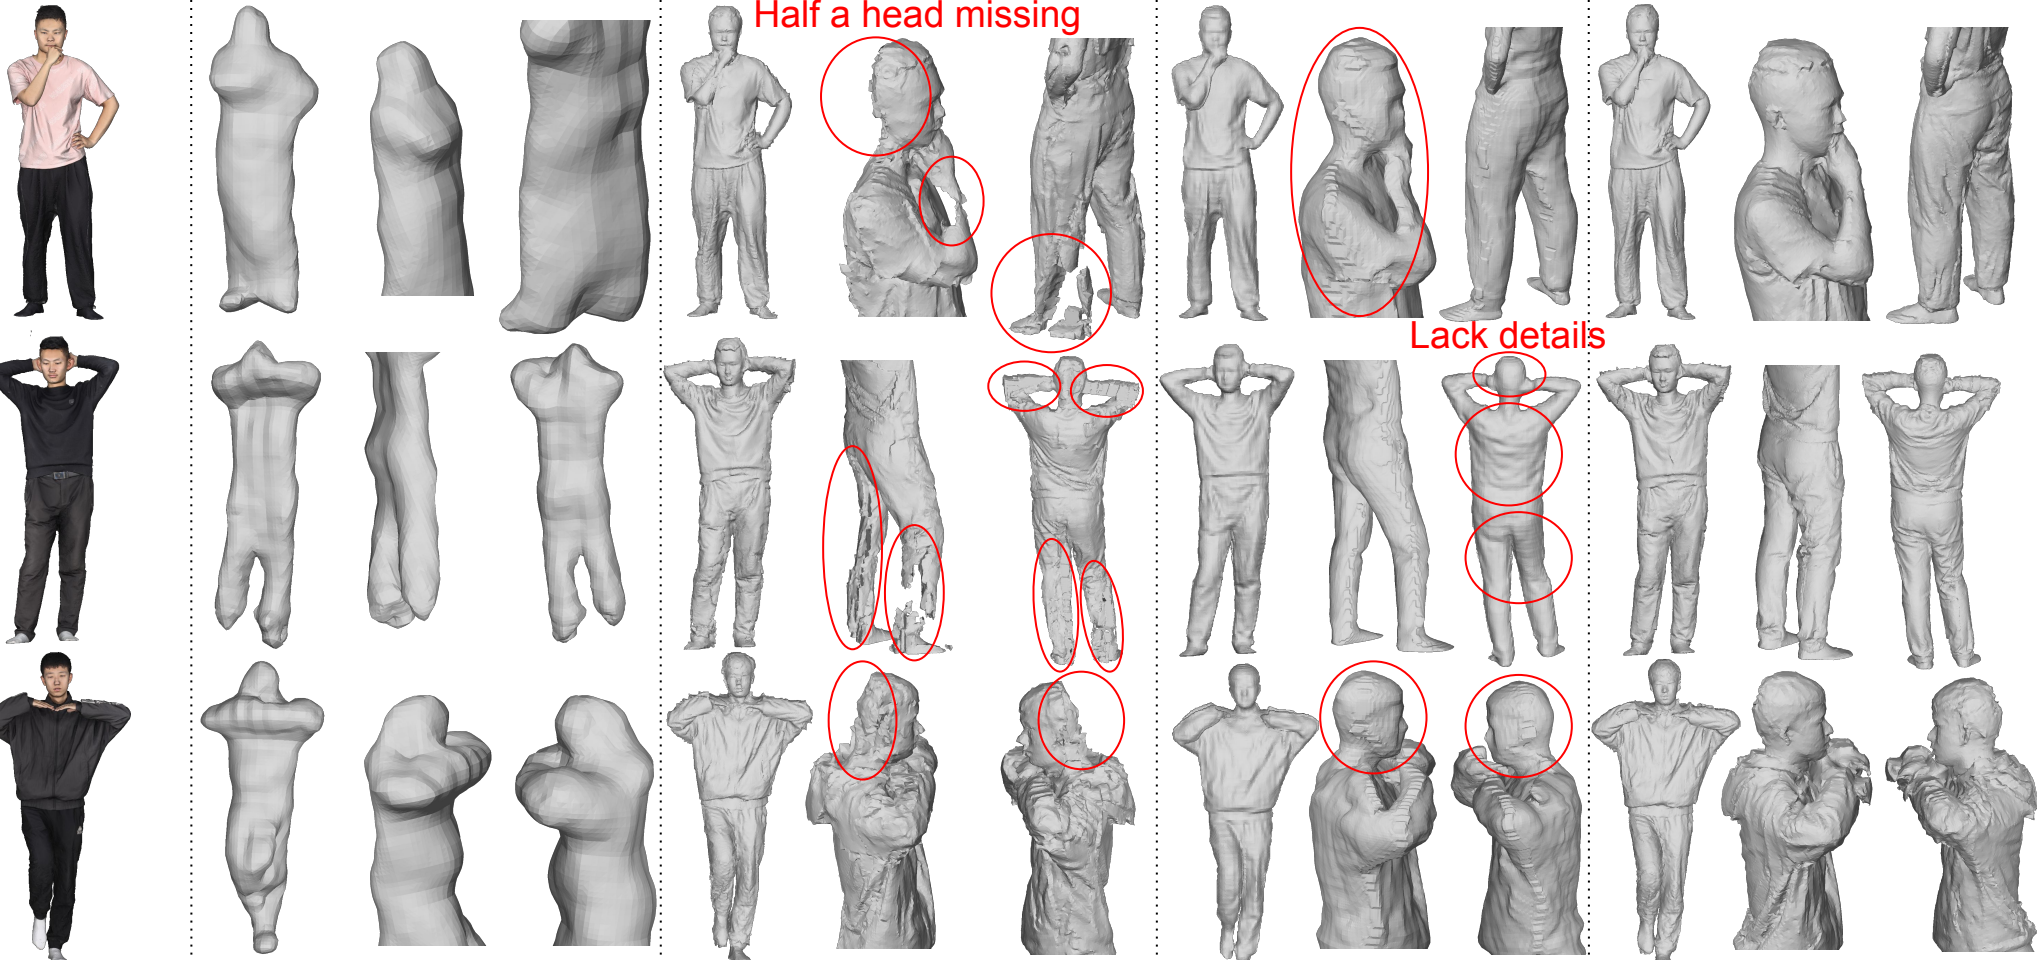

(a) Input Image

(b) One-2-3-45

(c) Zero-1-to-3 w  
Pixel-aligned Implicit Model

(d) IntegratedPIFu

(e) Ours w/o SMPL-X

Supplement: Supplementary file 2 [file Chan_R-Cyclic_Diffuser_Reductive_CVPR_2024_supplemental.zip]

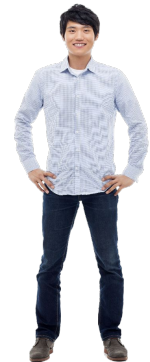

(a) Input Image

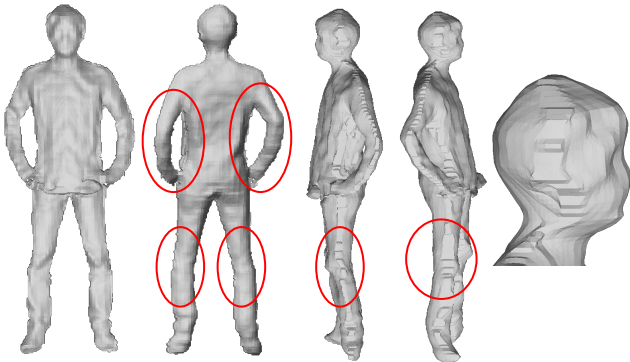

(b) IntegratedPIFu

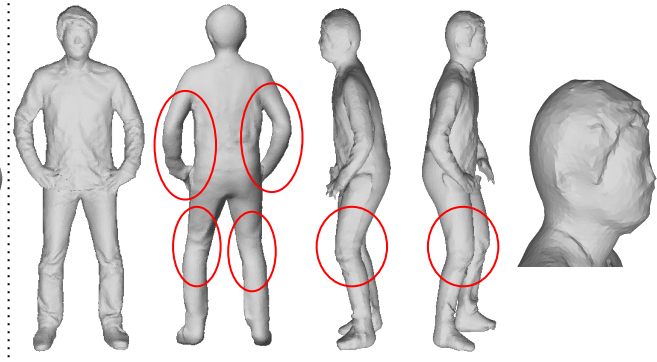

(c) ICON

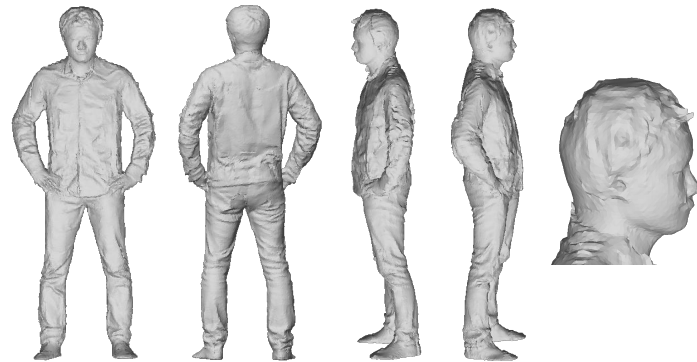

(d) Ours w/o SMPL-X

Supplement: Supplementary file 7 [file Chan_R-Cyclic_Diffuser_Reductive_CVPR_2024_supplemental.zip]
